# Supplementary material for: Pharmacological hallmarks of allostery at the M4 muscarinic receptor elucidated through structure and dynamics
Source: eLife. 2023 May 30;12:e83477. doi: 10.7554/eLife.83477 (PMC10229135; doi:10.7554/eLife.83477)
Supplement: Figure 1—figure supplement 1—source data 1. [file elife-83477-fig1-figsupp1-data1.xlsx]

## Sheet: Figure 1 – figure supplement 1A
	[3H]-NMS Interaction of Iperoxo and LY2033298 (LY298)
		0 M LY2033298			1e-7M LY298			3e-7M LY298			1e-6M LY298			3e-6M LY298			1e-5M LY298
	Log [Iperoxo] (M)	MEAN	SEM	N	MEAN	SEM	N	MEAN	SEM	N	MEAN	SEM	N	MEAN	SEM	N	MEAN	SEM	N
	Buffer (-14)	100	0	4	88.7959	6.59073	4	82.7533	7.49783	4	89.3731	3.19462	4	78.8877	4.57755	4	71.9748	6.37128	4
	-11	95.5326	5.56245	4	97.2597	2.7988	4	90.9739	6.67468	4	92.8139	3.32903	4	76.2566	7.64642	4	69.2236	3.9026	4
	-10	99.71	3.17723	4	96.1494	1.63053	4	84.7788	3.26352	4	78.7399	7.70043	4	56.4619	9.18928	4	47.2259	7.30891	4
	-9	88.442	4.94444	4	61.3888	2.73678	4	47.2962	1.74958	4	30.8193	3.56583	4	17.4489	2.78809	4	10.5114	1.39892	4
	-8	52.2101	4.82429	4	24.483	1.89471	4	13.8451	1.87344	4	7.68117	0.612245	4	3.50535	0.325288	4	3.408	0.743087	4
	-7	14.4173	1.05631	4	6.66926	1.57502	4	3.41268	0.326157	4	2.01796	0.702926	4	0.730842	0.315299	4	2.46795	1.30026	4
	-6	4.4199	0.217166	4	0.898096	0.282043	4	1.25386	0.714048	4	1.74541	1.35167	4	0.792612	0.614354	4	0.514496	0.429123	4
	Non-specific (-5)	0.22988	0.227189	4	1.43413	0.43013	4	0.584834	0.125929	4	-0.0359843	0.364885	4	0.615559	0.635011	4
	[3H]-NMS Interaction of ACh and LY2033298 (LY298)
		0 M LY2033298			1e-7M LY298			3e-7M LY298			1e-6M LY298			3e-6M LY298			1e-5M LY298
	Log [ACh] (M)	MEAN	SEM	N	MEAN	SEM	N	MEAN	SEM	N	MEAN	SEM	N	MEAN	SEM	N	MEAN	SEM	N
	Buffer (-14)	89.3387	3.12995	4	91.0073	1.85198	4	94.5381	6.23483	4	80.0402	3.14432	4	58.3334	8.58321	4	37.2736	10.6248	3
	-11
	-10
	-9
	-8	95.5051	1.72614	4	95.7481	2.17207	4	96.8785	2.80517	4	85.9414	5.49932	4	56.9297	6.16279	4	32.5089	9.48392	3
	-7	99.3058	1.93278	4	99.9191	4.58896	4	89.3823	5.06073	4	67.7163	3.38295	4	39.3345	2.07653	4	20.928	2.49082	3
	-6	90.5364	5.69671	4	67.7625	7.88429	4	47.9131	7.02366	4	26.6393	5.60498	4	10.1575	0.780868	4	4.47201	0.626305	3
	-5	82.9421	10.2573	4	27.5831	5.13681	4	14.6798	3.32339	4	6.44087	1.97786	4	1.85607	0.540302	4	-0.300818	0.531158	3
	-4	39.1481	7.04434	4	4.5946	1.084	4	2.39371	0.913776	4	0.769386	0.109353	4	0.364384	0.522579	4	-1.80977	1.31164	3
	-3	4.36131	1.49626	4	1.19915	0.648314	4	2.53786	1.78438	4	2.19755	2.21788	4	-1.43519	1.25254	4	-1.47844	0.791546	3
	Non-specific (-2)	0.188439	0.0606889	4	0.232983	0.549054	4	-0.313515	0.241147	4	0.182471	0.520115	4	-0.302198	0.211759	4	-0.482582	0.354212	3
	[3H]-NMS Interaction of Iperoxo and VU0467154 (VU154)
		0 M VU0467154			1e-7M VU154			3e-7M VU154			1e-6M VU154			3e-6M VU154			1e-5M VU154
	Log [Iperoxo] (M)	MEAN	SEM	N	MEAN	SEM	N	MEAN	SEM	N	MEAN	SEM	N	MEAN	SEM	N	MEAN	SEM	N
	Buffer (-14)	100	0	8	81.5246	5.20254	8	85.6645	5.40488	8	86.4154	4.77824	8	90.3441	6.42655	8	75.8209	11.226	8
	-11	98.5806	1.61644	8	86.4804	5.51817	8	90.1026	2.12547	8	102.07	5.24322	8	95.4998	7.18395	8	81.1661	9.47004	8
	-10	99.4221	3.36268	8	85.1679	5.96584	8	87.2369	4.40714	8	93.2293	4.36218	8	95.9575	8.40982	8	76.2097	8.39045	8
	-9	89.5684	2.69749	8	77.5676	3.48544	8	73.3255	4.00108	8	58.8622	3.37915	8	61.9083	5.05521	8	51.0362	4.08836	8
	-8	55.334	3.46215	8	42.5894	3.84153	8	33.887	3.01856	8	21.8295	1.27741	8	20.2302	1.75242	8	17.0159	0.891111	8
	-7	19.7856	2.49876	8	15.8397	2.09564	8	7.83104	0.751733	8	5.10175	0.512522	8	4.13319	0.638463	8	3.69007	0.445073	8
	-6	5.32954	0.918459	8	3.44462	0.531699	8	1.73291	0.363235	8	1.65619	0.481761	8	1.01902	0.622372	8	0.959139	0.483702	8
	Non-specific (-5)	1.84723	0.787968	8	0.929488	0.592776	8	0.637052	0.320391	8	0.193852	0.403227	8	-0.262877	0.528173	5	1.2951	0.757683	3
	[3H]-NMS Interaction of Iperoxo and VU0467154 (VU154)
		0 M VU0467154			1e-7M VU154			3e-7M VU154			1e-6M VU154			3e-6M VU154			1e-5M VU154
	Log [ACh] (M)	MEAN	SEM	N	MEAN	SEM	N	MEAN	SEM	N	MEAN	SEM	N	MEAN	SEM	N	MEAN	SEM	N
	Buffer (-14)	99.1879	0.462375	4	92.7038	2.14981	4	97.6338	1.73015	4	92.8939	2.68944	4	96.9181	1.29832	4	86.3381	2.0267	2
	-11
	-10
	-9
	-8	94.5541	2.84098	4	96.351	2.63362	4	96.4856	2.19629	4	94.7288	1.94203	4	93.9288	2.51356	4	93.1916	1.6485	3
	-7	93.7937	2.73859	4	93.814	2.35791	4	94.7299	4.58701	4	92.6291	2.58057	4	90.406	2.41669	4	86.2045	3.89921	3
	-6	90.9295	1.89386	4	91.478	2.78254	4	82.7013	2.42722	4	67.4928	3.39063	4	62.9393	5.92805	4	58.3819	7.52334	4
	-5	83.2028	7.37996	4	71.37	9.63317	4	50.6292	3.72857	4	28.0327	2.5878	4	23.2878	2.22826	4	18.3166	2.25785	4
	-4	42.292	9.45034	4	23.0035	2.51551	4	12.3696	2.0898	4	4.9521	0.564177	4	5.43862	1.71498	4	3.52584	0.863793	4
	-3	3.91514	0.871072	4	2.81614	0.74812	4	2.84108	1.19643	4	0.97596	0.52339	4	1.90719	1.5697	4	1.46616	0.795349	4
	Non-specific (-2)	0.00439476	0.0210115	4	0.289933	0.23262	4	0.358247	0.541275	4	0.892177	0.968205	4	0.25793	0.345915	4	0.695099	0.713313	4

## Sheet: Figure 1 – figure supplement 1B
	TRUPATH Gi1 – Interaction of Iperoxo and LY2033298 (LY298)
		0 M LY2033298			1e-7M LY298			3e-7M LY298			1e-6M LY298			3e-6M LY298			1e-5M LY298
	Log [Iperoxo] (M)	MEAN	SEM	N	MEAN	SEM	N	MEAN	SEM	N	MEAN	SEM	N	MEAN	SEM	N	MEAN	SEM	N
	Buffer	-12.2575	3.7529	4	7.7029	3.47387	4	26.5445	6.28557	4	46.9448	5.79759	4	66.3626	6.4096	4	80.2385	3.13615	4
	-12	5.4097	2.65425	4	28.32	3.91954	4	47.4098	2.09248	4	63.2473	4.68237	4	77.8283	5.82902	4	87.4852	2.27411	4
	-11	17.4881	2.9584	3	40.2733	0.683892	3	56.0725	0.446497	3	71.8716	3.19203	3	86.5391	4.16776	3	89.1363	3.00242	3
	-10	24.2118	3.55492	4	52.1385	2.90471	4	66.2661	2.2374	4	76.9925	2.62159	4	91.5521	2.5745	4	96.0028	1.14496	4
	-9	49.588	3.05509	4	76.3976	0.822566	4	85.3805	0.890796	4	93.7052	2.24623	4	100.333	1.44443	4	98.9934	3.76809	4
	-8	85.6349	0.660747	4	98.4495	2.44652	4	97.2223	2.15695	4	101.319	1.85887	4	103.971	0.767946	4	101.839	1.50985	4
	-7	97.9442	1.98005	4	101.51	2.72205	4	100.059	0.533603	4	102.411	1.4565	4	104.72	0.832058	4	103.056	1.47128	4
	-6	100	0	4	100	0	4	100	0	4	100	0	4	100	0	4	100	0	4
	TRUPATH Gi1 – Interaction of ACh and LY2033298 (LY298)
		0 M LY2033298			1e-7M LY298			3e-7M LY298			1e-6M LY298			3e-6M LY298			1e-5M LY298
	Log [ACh] (M)	MEAN	SEM	N	MEAN	SEM	N	MEAN	SEM	N	MEAN	SEM	N	MEAN	SEM	N	MEAN	SEM	N
	Buffer	-9.83353	5.76693	4	34.1204	8.74131	4	52.6514	7.92778	4	65.6066	6.25586	4	85.4037	5.12646	4	91.6863	5.13712	4
	-12
	-11
	-10	6.48873	4.74259	4	33.9878	7.63913	4	53.0877	6.2184	4	75.1839	10.1021	4	91.9811	5.35612	4	93.7103	5.16836	4
	-9	13.5628	6.19211	3	38.2942	8.37869	3	61.1583	12.7213	3	75.773	6.44399	3	94.2942	4.36455	3	103.205	5.29158	3
	-8	17.7033	4.25334	4	58.595	5.72235	4	74.9296	4.75093	4	84.8992	4.91854	4	106.953	3.58946	4	93.4015	5.82112	4
	-7	53.2915	4.90681	4	81.8951	7.31518	4	80.0543	10.0736	4	96.2222	2.49879	4	108.844	4.20803	4	106.407	4.21621	4
	-6	88.3604	4.09748	4	99.9973	4.35107	4	91.1174	10.5804	4	99.4566	3.37787	4	106.004	2.72606	4	106.264	1.99871	4
	-5	101.535	0.513887	4	102.146	4.54858	4	98.9844	3.73382	4	101.363	7.59149	4	107.642	4.33728	4	103.133	3.72369	4
	-4	95.9675	4.03248	4	101.793	1.79296	4	102.091	2.09066	4	105.386	5.38566	4	101.567	8.94209	4	101.906	6.19867	4
	TRUPATH Gi1 – Interaction of Iperoxo and VU0467154 (VU154)
		0 M VU0467154			1e-7M VU154			3e-7M VU154			1e-6M VU154			3e-6M VU154			1e-5M VU154
	Log [Iperoxo] (M)	MEAN	SEM	N	MEAN	SEM	N	MEAN	SEM	N	MEAN	SEM	N	MEAN	SEM	N	MEAN	SEM	N
	Buffer	-18.4389	2.7247	4	-12.4005	1.94153	4	-1.12826	5.76967	4	-3.69736	2.91523	4	1.22787	3.26538	4	6.00925	3.52806	4
	-12	1.79355	1.79355	4	4.34548	3.54973	4	10.8393	3.02005	4	11.2881	3.98451	4	10.7631	4.70632	4	16.2836	5.42487	3
	-11	14.8623	1.94287	3	14.0062	2.12285	3	15.9018	3.72547	3	18.9448	4.84692	3	22.0317	5.52786	3	25.5229	6.95075	3
	-10	16.6455	5.68574	4	17.4185	7.58438	4	25.7889	4.16331	4	24.5222	5.47834	4	27.4794	5.44282	4	25.5852	6.29765	4
	-9	42.9794	5.08585	4	46.2021	4.26907	4	50.5227	1.60049	4	52.3004	4.82855	4	57.4724	5.49925	4	59.2379	6.52057	4
	-8	84.3456	5.12836	4	86.735	4.62597	4	81.1336	4.50493	4	86.6782	4.1559	4	87.39	4.78947	4	88.5953	3.79184	4
	-7	96.1206	4.45893	4	97.6175	2.63078	4	97.7366	0.984663	4	98.6178	2.50207	4	96.2736	2.37608	4	100.913	1.21643	4
	-6	97.1681	2.83192	4	100	0	4	100	0	4	100	0	4	100	0	4	100	0	4
	TRUPATH Gi1 – Interaction of ACh and VU0467154 (VU154)
		0 M VU0467154			1e-7M VU154			3e-7M VU154			1e-6M VU154			3e-6M VU154			1e-5M VU154
	Log [ACh] (M)	MEAN	SEM	N	MEAN	SEM	N	MEAN	SEM	N	MEAN	SEM	N	MEAN	SEM	N	MEAN	SEM	N
	Buffer	0	0	4	9.53543	1.85831	4	14.6534	2.65158	4	17.0125	7.8825	4	25.2169	8.63877	4	32.5218	12.6312	4
	-12
	-11
	-10	7.80986	1.53186	4	8.9302	1.32124	4	11.1089	5.45192	4	22.1767	8.5046	4	34.2199	6.52287	4	44.5685	10.3505	4
	-9	11.2248	3.01923	3	11.7204	5.28431	3	17.6964	8.90547	3	27.927	13.4312	3	38.4291	8.89689	3	49.1267	10.7315	3
	-8	23.9474	2.61829	4	25.4799	4.85307	4	35.4411	5.7441	4	49.968	2.7255	4	61.1577	4.30236	4	67.8861	6.3444	4
	-7	53.3648	2.9712	4	55.9429	4.00667	4	63.5187	5.98478	4	72.4075	2.28541	4	82.8804	1.60026	4	84.2643	4.77184	4
	-6	88.042	2.2305	4	89.132	2.35263	4	92.3345	3.09736	4	93.1553	3.19162	4	97.8022	2.66754	4	96.2429	4.04645	4
	-5	99.8176	1.42723	4	99.0175	0.825961	4	97.7919	1.36213	4	99.6219	2.80215	4	100.617	5.63874	4	97.6007	6.4066	4
	-4	97.514	1.61381	4	97.4986	1.63293	4	94.9983	5.40044	4	95.1101	8.91632	4	90.2675	8.7099	4	88.3414	8.83224	4
