# Supplementary material for: Pharmacological hallmarks of allostery at the M4 muscarinic receptor elucidated through structure and dynamics
Source: eLife. 2023 May 30;12:e83477. doi: 10.7554/eLife.83477 (PMC10229135; doi:10.7554/eLife.83477)
Supplement: Figure 1—figure supplement 2—source data 1. [file elife-83477-fig1-figsupp2-data1.xlsx]

## Sheet: Figure 1 – figure supplement 2A
	pERK 1/2 Interaction of ACh and LY2033298 (LY298)
		0 M LY2033298			3e-8M LY298			1e-7M LY298			3e-7M LY298			1e-6M LY298			3e-6M LY298
	Log [ACh] (M)	MEAN	SEM	N	MEAN	SEM	N	MEAN	SEM	N	MEAN	SEM	N	MEAN	SEM	N	MEAN	SEM	N
	Buffer (-11)	-0.00311803	0.00370715	4	2.83244	0.576176	4	22.1098	8.59329	4	79.1264	5.60875	4	97.6769	2.32312	4	100	0	4
	-10	1.16478	1.68837	4	14.3836	8.16292	4	31.0334	9.77441	4	70.8732	4.22579	4	80.855	0.196972	4	80.2057	4.00564	4
	-9	0.0039509	0.467339	3	11.7677	4.52473	3	44.5596	2.81994	3	76.689	5.79492	4	74.7996	2.06357	4	71.6447	1.67947	4
	-8	26.1823	4.7618	4	53.6214	5.55398	4	66.3489	5.01338	4	78.0333	1.41732	4	72.3186	4.46106	4	66.5403	1.96484	4
	-7	74.357	0.970769	4	77.9696	1.33435	4	74.152	4.95893	4	75.9852	4.29294	4	72.7295	2.61415	4	70.0964	1.71173	4
	-6	85.7621	4.46958	4	83.9054	3.75361	4	79.6086	4.09968	4	83.9753	3.38489	4	70.9379	1.65603	4	68.9811	0.652517	4
	-5	84.428	1.02944	4	82.9564	2.50875	4	76.7773	2.75821	4	78.9305	2.71713	4	67.7428	3.76751	4	67.1602	2.02834	4
	FBS control	100	0	4	100	0	4	100	0	4	100	0	4	85.2967	5.02633	4	73.9472	4.45917	4
	pERK 1/2 Interaction of Iperoxo and LY2033298 (LY298)
		0 M LY2033298			1e-8M LY298			3e-8M LY298			1e-7M LY298			3e-7M LY298			1e-6M LY298
	Log [Iperoxo] (M)	MEAN	SEM	N	MEAN	SEM	N	MEAN	SEM	N	MEAN	SEM	N	MEAN	SEM	N	MEAN	SEM	N
	Buffer (-13)	0	0	8	2.11555	1.52799	8	12.9426	4.96304	8	25.2982	8.0777	8	59.5608	5.35431	8	76.1436	3.73046	8
	-12	-0.564408	0.98916	8	1.79529	1.29167	8	17.57	6.61428	8	27.4314	7.97184	8	62.133	5.27448	8	75.3585	3.81948	8
	-11	5.00656	0.997846	8	12.9824	3.24862	8	27.2703	7.02915	8	39.4569	7.09829	8	65.2774	6.11022	8	74.3406	2.99116	8
	-10	51.2391	3.01694	8	59.1495	5.04236	8	63.5244	5.80976	8	70.2721	5.10891	8	76.6706	3.25477	8	83.05	3.79872	8
	-9	85.341	2.32604	8	83.7793	5.45262	8	82.6799	5.32644	8	84.2125	4.25697	8	86.1173	3.46468	8	91.8519	3.48482	8
	-8	93.1044	2.22616	8	89.8838	3.87757	8	87.7646	3.85405	8	90.1212	4.0091	8	91.6105	4.68401	8	96.1046	4.95851	8
	FBS control	100	0	8	93.3396	3.54911	8	95.8208	4.03162	8	93.6699	4.43173	8	102.847	5.73824	8	102.54	3.79847	8
	pERK 1/2 Interaction of ACh and VU0467154 (VU154)
		0 M VU0467154			1e-7M VU154			3e-7M VU154			1e-6M VU154			3e-6M VU154			1e-5M VU154
	Log [ACh] (M)	MEAN	SEM	N	MEAN	SEM	N	MEAN	SEM	N	MEAN	SEM	N	MEAN	SEM	N	MEAN	SEM	N
	Buffer (-11)	-0.811708	0.812345	4	-0.446681	0.651243	4	2.71864	0.900691	4	16.2659	7.46067	4	30.8869	7.44382	4	50.9593	8.76357	4
	-10	4.4557	3.98644	4	8.1372	5.36386	4	17.0052	9.86387	4	38.223	18.1323	4	45.8133	14.5055	4	57.1896	13.7968	4
	-9	-0.968533	1.15926	3	1.68633	1.45086	3	7.68866	4.17531	3	31.0899	9.49847	3	42.1124	7.30933	3	46.2531	3.49421	3
	-8	27.1256	4.03191	4	39.8796	5.02865	4	50.2119	5.11125	4	63.4223	5.32707	4	74.8873	4.76551	4	78.4328	5.67827	4
	-7	79.703	2.23149	4	84.9124	1.33379	4	83.4335	3.95483	4	81.4203	3.80462	4	86.8092	5.40121	4	88.0823	5.24145	4
	-6	84.8462	3.43575	4	87.1921	4.2228	4	92.6569	6.5028	4	94.2595	5.10784	4	89.9112	4.9096	4	89.5682	6.31328	4
	-5	80.0389	5.13069	4	84.833	2.81387	4	91.0996	5.21713	4	89.3107	3.11982	4	85.6743	2.64464	4	84.8307	5.48404	4
	FBS control	100	0	4	100	0	4	100	0	4	100	0	4	100	0	4	100	0	4
	pERK 1/2 Interaction of Iperoxo and VU0467154 (VU154)
		0 M VU0467154			1e-7M VU154			3e-7M VU154			1e-6M VU154			3e-6M VU154			1e-5M VU154
	Log [Iperoxo] (M)	MEAN	SEM	N	MEAN	SEM	N	MEAN	SEM	N	MEAN	SEM	N	MEAN	SEM	N	MEAN	SEM	N
	Buffer (-13)	0.124107	0.498905	8	-1.63935	2.62293	8	10.7148	3.437	8	26.8193	5.36267	8	54.6989	6.44346	8	66.1116	4.95443	8
	-12	0.106577	1.03562	8	0.815813	1.36366	8	11.2893	1.80975	8	28.5103	4.89342	8	50.7541	6.94638	8	56.0788	5.52446	7
	-11	4.68805	1.72798	8	13.3138	3.37931	8	19.3584	2.70632	8	39.4895	4.06661	8	59.9598	5.22746	8	60.6238	6.21337	8
	-10	47.7229	2.50177	8	62.8666	5.59895	8	68.3907	4.96577	8	75.6283	5.2333	8	75.7386	5.73009	8	77.5609	3.70047	8
	-9	85.1314	2.9847	8	86.5948	5.81994	8	84.2229	6.04019	8	84.5432	5.89833	8	90.3428	5.92802	8	87.4811	5.39653	8
	-8	97.1587	2.52245	8	93.7364	6.44775	8	91.7051	5.32851	8	92.8024	6.51315	8	97.2144	5.22077	8	99.5787	5.01749	8
	FBS control	100	0	8	95.5633	5.15129	8	97.6354	4.64478	8	94.9914	6.88703	8	102.765	4.9389	8	97.3936	6.56804	8

## Sheet: Figure1–figure supplement 2B-E
	Figure S2B – Efficacy of pERK1/2 activation in TRUPATH (log [tau])
	ACh			Ipx			LY298			VU154
	MEAN	SEM	N	MEAN	SEM	N	MEAN	SEM	N	MEAN	SEM	N
	3.269	0.05586	4	1.744	0.02775	8	1.19	0.03	12	0.11	0.03	12
	Figure S2C – Transducer coupling of pERK1/2 (log [tau] / [pKi or pKb])
	ACh			Ipx			LY298			VU154
	MEAN	SEM	N	MEAN	SEM	N	MEAN	SEM	N	MEAN	SEM	N
	7.72	0.123693	4	9.985	0.09	8	6.84	0.0761577	12	5.94	0.114018	12
	Figure S2D – Functional modulation of pERK1/2 (log [alpha•beta])
		ACh			Ipx
		MEAN	SEM	N	MEAN	SEM	N
	LY298	2.29	0.22	4	1.08	0.28	8
	VU154	0.88	0.23	4	0.66	0.15	8
	Figure S2E – Efficacy modulation of pERK1/2 (log [beta] = log [alpha•beta] – log [alpha])
		ACh			Ipx
		MEAN	SEM	N	MEAN	SEM	N
	LY298	-0.3	0.241661	4	-0.78	0.297321	8
	VU154	-0.73	0.264197	4	-0.37	0.180278	8
