# Supplementary material for: Pharmacological hallmarks of allostery at the M4 muscarinic receptor elucidated through structure and dynamics
Source: eLife. 2023 May 30;12:e83477. doi: 10.7554/eLife.83477 (PMC10229135; doi:10.7554/eLife.83477)
Supplement: Figure 1—source data 1. [file elife-83477-fig1-data1.xlsx]

## Sheet: Figure 1D-G
	Figure 1D – Binding Affinity (pKi or pKB)
	ACh			Ipx			LY298			VU154
	MEAN	SEM	N	MEAN	SEM	N	MEAN	SEM	N	MEAN	SEM	N
	4.5	0.06	4	8.3	0.06	4	5.65	0.07	8	5.83	0.11	12
	Figure 1E – Binding modulation (log [alpha])
		ACh			Ipx
		MEAN	SEM	N	MEAN	SEM	N
	LY298	2.59	0.1	4	1.86	0.1	4
	VU154	1.61	0.13	4	1.03	0.1	8
	Figure 1F – Agonist Binding Affinity with PAM bound (pKi+log [alpha])
		LY298			VU154			Apo
		MEAN	SEM	N	MEAN	SEM	N	MEAN	SEM	N
	ACh	7.09	0.116619	4	6.11	0.143178	4	4.5	0.06	4
	Ipx	10.16	0.116619	4	9.33	0.116619	8	8.3	0.06	4
	Figure 1G – PAM Binding Affinity with agonist bound (pKB+log [alpha])
		ACh			Ipx			Apo
		MEAN	SEM	N	MEAN	SEM	N	MEAN	SEM	N
	LY298	8.24	0.122066	4	7.51	0.122066	4	5.65	0.07	8
	VU154	7.44	0.170294	4	6.86	0.148661	8	5.83	0.11	12

## Sheet: Figure 1H-K
	Figure 1H – Efficacy of Gi1 activation in TRUPATH (log [tau])
	ACh			Ipx			LY298			VU154
	MEAN	SEM	N	MEAN	SEM	N	MEAN	SEM	N	MEAN	SEM	N
	2.71	0.14	4	1.49	0.12	4	1.02	0.03	7	-0.55	0.08	8
	Figure 1I – Transducer coupling of Gi1 in TRUPATH (log [tau] / [pKi or pKb])
	ACh			Ipx			LY298			VU154
	MEAN	SEM	N	MEAN	SEM	N	MEAN	SEM	N	MEAN	SEM	N
	7.16	0.176918	4	9.735	0.146969	4	6.67	0.0761577	8	5.28	0.136015	8
	Figure 1J – Functional modulation of Gai1 activation in TRUPATH (log [alpha•beta])
		ACh			Ipx
		MEAN	SEM	N	MEAN	SEM	N
	LY298	2.01	0.14	4	1.96	0.16	4
	VU154	1.22	0.13	4	0.2	0.13	4
	Figure 1K – Efficacy modulation of Gai1 activation in TRUPATH (log [beta] = log [alpha•beta] – log [alpha])
		ACh			Ipx
		MEAN	SEM	N	MEAN	SEM	N
	LY298	-0.58	0.172047	4	0.1	0.18868	4
	VU154	-0.39	0.183848	4	-0.83	0.164012	4
