# Supplementary material for: Pharmacological hallmarks of allostery at the M4 muscarinic receptor elucidated through structure and dynamics
Source: eLife. 2023 May 30;12:e83477. doi: 10.7554/eLife.83477 (PMC10229135; doi:10.7554/eLife.83477)
Supplement: Figure 4—figure supplement 2—source data 1. [file elife-83477-fig4-figsupp2-data1.xlsx]

## Sheet: Figure 4 – figure supplement 2
	[3H]-NMS binding – Flp-In CHO WT human M4 (Iperoxo vs LY298)											[3H]-NMS binding – Flp-In CHO WT human M4 (Iperoxo vs VU154)
	Log [Ligand] (M)	Ipx			-8.5M Ipx + LY2033298			LY2033298				Log [Ligand] (M)	Ipx			-8.5M Ipx + VU154			VU154
		MEAN	SEM	N	MEAN	SEM	N	MEAN	SEM	N			MEAN	SEM	N	MEAN	SEM	N	MEAN	SEM	N
	-14	92.2338	1.60668	11	73.3168	1.73627	6	100	0	9		-14	92.2338	1.60668	11	73.3168	1.73627	6	100	0	9
	-11	87.8338	2.24019	11	74.8144	0.838366	3	100.49	1.86382	4		-11	87.8338	2.24019	11	66.1845	3.28384	3	90.3809	4.76042	5
	-10	92.8055	1.54101	11	73.3132	1.34796	6	99.208	1.66077	9		-10	92.8055	1.54101	11	75.2518	2.1331	5	98.4922	1.1577	9
	-9	85.098	1.52977	11	73.3807	2.14775	6	98.9562	2.83169	9		-9	85.098	1.52977	11	72.546	1.8322	5	98.6479	0.910304	9
	-8	53.444	1.6884	11	68.714	0.590064	6	99.1102	2.87533	9		-8	53.444	1.6884	11	70.0286	1.77189	5	95.7961	1.43866	9
	-7	15.0233	0.497082	11	52.9327	5.83805	6	99.4831	2.7224	9		-7	15.0233	0.497082	11	67.8915	1.51822	5	100.523	1.79392	9
	-6	2.79857	0.277037	11	22.1879	5.98995	6	86.1181	2.48211	9		-6	2.79857	0.277037	11	35.5257	2.00854	5	94.0236	2.569	9
	-5	0.612658	0.31452	11	4.91245	1.16109	6	72.9899	6.34759	9		-5	0.612658	0.31452	11	29.9166	0.878969	5	83.3545	3.25358	9
	[3H]-NMS binding – Flp-In CHO Y89A human M4 (Iperoxo vs LY298)											[3H]-NMS binding – Flp-In CHO Y89A human M4 (Iperoxo vs VU154)
	Log [Ligand] (M)	Ipx			-8.5M Ipx + LY2033298			LY2033298				Log [Ligand] (M)	Ipx			-8.5M Ipx + VU154			VU154
	-14	89.9524	2.444	6	75.3026	0.899534	3	100	0	6		-14	89.9524	2.444	6	81.9698	8.78469	3	98.4587	1.23826	6
	-11	92.8012	3.026	6	73.5597	6.19334	2	104.476	4.82383	4		-11	92.8012	3.026	6				100.41	5.26406	2
	-10	96.1865	4.07623	6	78.6663	5.27831	3	106.116	3.07377	6		-10	96.1865	4.07623	6	74.9725	7.83685	3	100.988	2.81931	6
	-9	93.6434	2.86704	6	78.4916	3.68664	3	104.817	4.2768	6		-9	93.6434	2.86704	6	79.2466	7.73793	3	105.954	4.09616	6
	-8	50.0004	1.40675	6	74.8595	3.98245	3	107.457	7.76682	6		-8	50.0004	1.40675	6	81.5559	8.91841	3	101.877	3.66886	6
	-7	11.0952	0.876628	6	77.1558	5.30611	3	108.752	5.85404	6		-7	11.0952	0.876628	6	86.6371	6.2516	3	103.16	2.22901	6
	-6	3.49265	0.495516	6	78.4694	7.34103	3	106.713	5.5238	6		-6	3.49265	0.495516	6	82.8167	4.8476	3	104.735	0.973661	6
	-5	0.725293	0.516007	6	85.4527	2.17225	3	112.399	6.22101	6		-5	0.725293	0.516007	6	86.0004	2.75693	3	101.996	6.74984	6
	[3H]-NMS binding – Flp-In CHO Q184A human M4 (Iperoxo vs LY298)											[3H]-NMS binding – Flp-In CHO Q184A human M4 (Iperoxo vs VU154)
	Log [Ligand] (M)	Ipx			-9M Ipx + LY2033298			LY2033298				Log [Ligand] (M)	Ipx			-9.0M Ipx + VU154			VU145
	-14	95.3174	1.50029	10	83.7871	2.01989	5	99.0451	0.954861	9		-14	95.3174	1.50029	10	85.8338	2.62762	5	99.5052	0.398517	8
	-11	92.7602	3.29883	10	84.6684	2.67444	3	100.542	1.35423	6		-11	92.7602	3.29883	10				97.2934	3.4253	3
	-10	90.8201	2.31906	10	82.7928	2.24697	5	99.3962	2.47184	9		-10	90.8201	2.31906	10	89.4825	3.35135	5	100.712	2.59353	8
	-9	80.2215	2.11982	10	83.8797	3.28741	5	101.5	1.30678	9		-9	80.2215	2.11982	10	88.2052	4.08923	5	104.877	1.45328	8
	-8	37.3432	1.76651	10	78.5326	1.55996	5	101.496	3.20645	9		-8	37.3432	1.76651	10	86.038	4.66304	5	101.174	1.63081	8
	-7	8.59599	0.363096	10	55.0684	6.52332	5	100.33	3.44462	9		-7	8.59599	0.363096	10	83.597	5.6735	5	102.365	1.78502	8
	-6	2.11359	0.228878	10	20.3743	7.87254	5	74.7546	5.3466	9		-6	2.11359	0.228878	10	62.5281	5.10734	5	96.8821	3.05056	8
	-5	0.596978	0.368144	10	4.86871	0.658526	5	36.9458	5.16543	9		-5	0.596978	0.368144	10	55.229	4.95406	5	94.0603	3.76696	8
	[3H]-NMS binding – Flp-In CHO F186A human M4 (Iperoxo vs LY298)											[3H]-NMS binding – Flp-In CHO F186A human M4 (Iperoxo vs VU154)
	Log [Ligand] (M)	Ipx			-8.5M Ipx + LY2033298			LY2033298				Log [Ligand] (M)	Ipx			-8.5M Ipx + VU154			VU154
	-14	98.8857	0.729654	8	79.6495	2.00902	4	94.1835	2.14347	7		-14	98.8857	0.729654	8	83.5295	3.44058	4	99.8639	0.136054	7
	-11	94.0903	4.3854	8	72.9839	5.4081	2	89.7503	6.10319	4		-11	94.0903	4.3854	8				99.0076	5.45769	3
	-10	94.072	1.84153	8	76.1549	3.57666	4	91.9712	2.88488	7		-10	94.072	1.84153	8	85.6313	1.06652	4	100.136	3.28813	7
	-9	89.2749	2.84746	8	77.5614	4.7728	4	94.7425	3.57886	7		-9	89.2749	2.84746	8	89.0918	2.67811	4	96.0094	3.09218	7
	-8	65.4542	3.15768	8	77.4185	4.47774	4	94.7895	2.90766	7		-8	65.4542	3.15768	8	85.4905	2.06976	4	94.5106	3.14932	7
	-7	21.0198	2.62925	8	80.7948	6.09292	4	97.8699	3.11407	7		-7	21.0198	2.62925	8	87.0133	2.80543	4	97.7701	3.09522	7
	-6	3.94023	0.924921	8	75.4368	6.29128	4	98.6912	4.52176	7		-6	3.94023	0.924921	8	96.515	4.28212	4	104.458	2.64181	7
	-5	0.845821	0.38258	8	73.0563	11.9589	4	103.88	5.57925	7		-5	0.845821	0.38258	8	94.4474	4.84983	4	103.787	6.59564	7
	[3H]-NMS binding – Flp-In CHO W435A human M4 (Iperoxo vs LY298)											[3H]-NMS binding – Flp-In CHO W435A human M4 (Iperoxo vs VU154)
	Log [Ligand] (M)	Ipx			-7.5M Ipx + LY2033298			LY2033298				Log [Ligand] (M)	Ipx			-7.5M Ipx + VU154			VU154
	-14	86.0952	4.1567	8	82.5792	2.25754	4	99.455	0.545037	7		-14	86.0952	4.1567	8	85.9391	3.80997	4	97.423	1.94195	8
	-11	87.4317	0	1	89.3259	0.655917	2	99.8129	4.13423	4		-11	87.4317	0	1				105.932	3.29731	4
	-10	87.7394	3.38616	8	87.3049	3.63379	4	100.479	2.15585	7		-10	87.7394	3.38616	8	94.9863	1.56969	4	101.409	3.85759	8
	-9	88.1488	3.58613	8	88.0966	3.64323	4	100.607	2.75772	7		-9	88.1488	3.58613	8	89.6052	3.39504	4	101.998	3.44898	8
	-8	90.5818	0.847726	8	85.8292	3.78127	4	101.037	3.11616	7		-8	90.5818	0.847726	8	86.5404	4.82414	4	102.333	2.65984	8
	-7	69.5692	3.4177	8	89.9661	1.98641	4	99.8932	3.45966	7		-7	69.5692	3.4177	8	93.6228	0.57251	4	102.15	2.97709	8
	-6	29.4716	1.80518	8	87.9006	4.14651	4	104.292	3.5713	7		-6	29.4716	1.80518	8	91.9691	2.31684	4	102.02	3.50239	8
	-5	8.90483	1.23254	8	92.5225	2.81483	4	108.323	6.07533	7		-5	8.90483	1.23254	8	93.1477	3.85489	4	107.492	5.16021	8
	-4	0.997644	0.366684	7								-4	0.997644	0.366684	7
	[3H]-NMS binding – Flp-In CHO Y439A human M4 (Iperoxo vs LY298)											[3H]-NMS binding – Flp-In CHO Y439A human M4 (Iperoxo vs LY298)
	Log [Ligand] (M)	Ipx			-7.0M Ipx + LY2033298			LY2033298				Log [Ligand] (M)	Ipx			-7.0M Ipx + VU154			VU154
	-14	86.5983	5.62251	8	72.4819	12.4558	4	94.3858	4.32535	8		-14	86.5983	5.62251	8	84.0424	14.3457	4	96.4859	3.51406	8
	-11				89.5487	5.02492	2	110.073	5.75627	5		-11				79.6404	2.1304	2	101.059	5.23393	3
	-10	67.2707	3.12013	8	80.2988	8.90379	4	104.282	7.16133	8		-10	67.2707	3.12013	8	88.0224	9.72799	4	96.5478	3.87984	8
	-9	78.9068	6.47913	8	100.133	10.5648	4	109.794	3.56491	8		-9	78.9068	6.47913	8	80.5692	9.71844	4	101.991	4.83958	8
	-8	83.0087	5.46605	8	91.3502	5.32224	4	96.2998	9.86412	8		-8	83.0087	5.46605	8	86.2959	10.3679	4	99.5785	7.48808	8
	-7	83.7699	10.2765	8	96.2494	8.59268	4	124.774	13.3146	8		-7	83.7699	10.2765	8	93.8143	17.8386	4	97.34	8.91725	8
	-6	76.0576	9.33896	8	77.3113	13.6573	4	119.836	17.2996	8		-6	76.0576	9.33896	8	98.4905	9.51361	4	98.5405	7.32122	8
	-5	45.747	2.1353	8	65.8116	24.4945	4	152.252	9.23245	8		-5	45.747	2.1353	8	122.928	19.9383	4	102.437	10.299	8
	-4	23.8283	6.22713	8								-4	23.8283	6.22713	8
	[3H]-NMS binding – Flp-In CHO WT human M4 (ACh vs LY298)											[3H]-NMS binding – Flp-In CHO WT human M4 (ACh vs VU154)
	Log [Ligand] (M)	ACh			-5.5M ACh + LY2033298			LY2033298				Log [Ligand] (M)	ACh			-5.5M ACh + VU154			VU154
	-14	94.4746	3.14357	7	82.4382	3.55819	3	100	0	9		-14	94.4746	3.14357	7	88.3236	4.35279	4	97.1168	1.81104	9
	-11				91.2541	0	1	100.49	1.86382	4		-11							90.3809	4.76042	5
	-10				82.5967	3.33673	3	99.208	1.66077	9		-10				86.6853	0.248115	4	98.4922	1.1577	9
	-9				82.4182	2.47977	3	98.9562	2.83169	9		-9				87.6917	1.56598	4	98.6479	0.910304	9
	-8	93.0708	3.9613	7	84.3629	4.93282	3	99.1102	2.87533	9		-8	93.0708	3.9613	7	87.9507	2.49164	4	95.7961	1.43866	9
	-7	90.0852	4.34012	7	75.2059	1.11252	3	99.4831	2.7224	9		-7	90.0852	4.34012	7	78.986	1.07848	4	100.523	1.79392	9
	-6	88.6858	1.88039	7	55.452	3.0501	3	86.1181	2.48211	9		-6	88.6858	1.88039	7	47.5688	4.24401	4	94.0236	2.569	9
	-5	68.7523	1.8797	7	16.1597	5.32042	3	72.9899	6.34759	9		-5	68.7523	1.8797	7	32.9091	5.42737	4	83.3545	3.25358	9
	-4	29.9617	2.74045	7								-4	29.9617	2.74045	7
	-3	0.703781	0.421916	7								-3	0.703781	0.421916	7
	-2	-0.531192	0.314904	7								-2	-0.531192	0.314904	7
	[3H]-NMS binding – Flp-In CHO Y89A human M4 (ACh vs LY298)											[3H]-NMS binding – Flp-In CHO Y89A human M4 (ACh vs VU154)
	Log [Ligand] (M)	ACh			-5.5M ACh + LY2033298			LY2033298				Log [Ligand] (M)	ACh			-5.5M ACh + VU154			VU154
	-14	93.7791	2.46091	6	78.2985	5.31624	3	100	0	6		-14	93.7791	2.46091	6	81.7694	1.917	3	98.4587	1.23826	6
	-11				74.1748	11.6017	2	104.476	4.82383	4		-11				68.6893	0	1	100.41	5.26406	2
	-10				80.7031	6.70711	3	106.116	3.07377	6		-10				84.7302	3.84892	3	100.988	2.81931	6
	-9				80.1374	6.01418	3	104.817	4.2768	6		-9				79.5223	2.25843	3	105.954	4.09616	6
	-8	97.9867	3.5507	6	83.0486	5.33624	3	107.457	7.76682	6		-8	97.9867	3.5507	6	82.2359	2.91403	3	101.877	3.66886	6
	-7	93.96	4.21162	6	77.8251	7.48302	3	108.752	5.85404	6		-7	93.96	4.21162	6	82.35	5.00846	3	103.16	2.22901	6
	-6	86.0337	3.85599	6	76.7718	4.64748	3	106.713	5.5238	6		-6	86.0337	3.85599	6	87.8774	5.88153	3	104.735	0.973661	6
	-5	62.1462	1.49775	6	80.4424	6.81319	3	112.399	6.22101	6		-5	62.1462	1.49775	6	83.6104	5.83288	3	101.996	6.74984	6
	-4	14.5605	1.27823	6								-4	14.5605	1.27823	6
	-3	-0.181183	0.461607	6								-3	-0.181183	0.461607	6
	-2	-0.701006	0.693986	6								-2	-0.701006	0.693986	6
	[3H]-NMS binding – Flp-In CHO Q184A human M4 (ACh vs LY298)											[3H]-NMS binding – Flp-In CHO Q184A human M4 (ACh vs VU154)
	Log [Ligand] (M)	ACh			-5.5M ACh + LY2033298			LY2033298				Log [Ligand] (M)	ACh			-5.5M ACh + VU154			VU154
	-14	92.8863	1.29558	6	78.9711	1.63744	4	99.0451	0.954861	9		-14	92.8863	1.29558	6	76.6525	4.32709	3	99.5052	0.398517	8
	-11				85.0512	7.04038	3	100.542	1.35423	6		-11							97.2934	3.4253	3
	-10				82.1801	4.54432	4	99.3962	2.47184	9		-10				78.5525	2.37121	3	100.712	2.59353	8
	-9				85.4106	2.29473	4	101.5	1.30678	9		-9				78.2579	4.50908	3	104.877	1.45328	8
	-8	86.7227	5.17788	6	76.6561	2.82563	4	101.496	3.20645	9		-8	86.7227	5.17788	6	80.7471	3.44336	3	101.174	1.63081	8
	-7	92.2661	1.31029	6	48.9782	9.51454	4	100.33	3.44462	9		-7	92.2661	1.31029	6	77.1945	2.95483	3	102.365	1.78502	8
	-6	85.3247	2.49284	6	24.9114	10.6753	4	74.7546	5.3466	9		-6	85.3247	2.49284	6	48.824	3.46557	3	96.8821	3.05056	8
	-5	60.4132	2.69752	6	10.2385	5.10647	4	36.9458	5.16543	9		-5	60.4132	2.69752	6	35.2029	1.68061	3	94.0603	3.76696	8
	-4	21.5456	0.929657	6								-4	21.5456	0.929657	6
	-3	2.32901	0.811715	6								-3	2.32901	0.811715	6
	-2	0.114732	0.334998	6								-2	0.114732	0.334998	6
	[3H]-NMS binding – Flp-In CHO F186A human M4 (ACh vs LY298)											[3H]-NMS binding – Flp-In CHO F186A human M4 (ACh vs VU154)
	Log [Ligand] (M)	ACh			-5M ACh + LY2033298			LY2033298				Log [Ligand] (M)	ACh			-5M ACh + VU154			VU154
	-14	96.5484	1.42164	6	68.3045	6.88767	3	94.1835	2.14347	7		-14	96.5484	1.42164	6	72.9391	8.18646	3	99.8639	0.136054	7
	-11				66.0303	1.85122	2	89.7503	6.10319	4		-11				65.4297	0	1	99.0076	5.45769	3
	-10				57.7145	2.52943	3	91.9712	2.88488	7		-10				74.7428	5.86738	3	100.136	3.28813	7
	-9				63.1742	4.99151	3	94.7425	3.57886	7		-9				62.6409	2.86474	3	96.0094	3.09218	7
	-8	86.7539	2.10496	6	67.453	3.98062	3	94.7895	2.90766	7		-8	86.7539	2.10496	6	68.9925	1.85813	3	94.5106	3.14932	7
	-7	85.3355	2.26116	6	70.5874	5.28638	3	97.8699	3.11407	7		-7	85.3355	2.26116	6	66.4533	1.95597	3	97.7701	3.09522	7
	-6	83.8484	2.97744	6	62.9429	1.79644	3	98.6912	4.52176	7		-6	83.8484	2.97744	6	72.2903	4.52732	3	104.458	2.64181	7
	-5	68.5861	0.882417	6	47.1217	11.689	3	103.88	5.57925	7		-5	68.5861	0.882417	6	66.8277	6.11788	3	103.787	6.59564	7
	-4	24.9385	2.27462	6								-4	24.9385	2.27462	6
	-3	3.03239	1.11474	6								-3	3.03239	1.11474	6
	-2	-0.36365	1.10533	6								-2	-0.36365	1.10533	6
	[3H]-NMS binding – Flp-In CHO W435A human M4 (ACh vs LY298)											[3H]-NMS binding – Flp-In CHO W435A human M4 (ACh vs VU154)
	Log [Ligand] (M)	ACh			-4.5M ACh + LY2033298			LY2033298				Log [Ligand] (M)	ACh			-4.5M ACh + VU154			VU154
	-14	92.6348	2.89334	7	82.9901	1.35158	3	99.455	0.545037	7		-14	92.6348	2.89334	7	84.0454	5.92294	4	97.423	1.94195	8
	-11				85.7675	0.22537	2	99.8129	4.13423	4		-11				84.0144	1.97849	2	105.932	3.29731	4
	-10				81.4394	3.10188	3	100.479	2.15585	7		-10				90.5542	6.93765	4	101.409	3.85759	8
	-9				88.2162	2.65608	3	100.607	2.75772	7		-9				92.5967	3.86042	4	101.998	3.44898	8
	-8	88.7803	2.11461	7	86.3665	1.45024	3	101.037	3.11616	7		-8	88.7803	2.11461	7	88.4366	3.16517	4	102.333	2.65984	8
	-7	91.1345	2.13571	7	92.4509	4.14484	3	99.8932	3.45966	7		-7	91.1345	2.13571	7	90.6143	1.72644	4	102.15	2.97709	8
	-6	89.8528	2.90015	7	86.6136	2.47453	3	104.292	3.5713	7		-6	89.8528	2.90015	7	94.537	3.15065	4	102.02	3.50239	8
	-5	93.5873	2.50573	7	93.723	5.77689	3	108.323	6.07533	7		-5	93.5873	2.50573	7	99.833	4.89485	4	107.492	5.16021	8
	-4	79.1762	4.06626	7								-4	79.1762	4.06626	7
	-3	28.574	2.57565	7								-3	28.574	2.57565	7
	-2	4.40288	0.463192	7								-2	4.40288	0.463192	7
	[3H]-NMS binding – Flp-In CHO Y439A human M4 (ACh vs LY298)											[3H]-NMS binding – Flp-In CHO Y439A human M4 (ACh vs VU154)
	Log [Ligand] (M)	ACh			-4M ACh + LY2033298			LY2033298				Log [Ligand] (M)	ACh			-4M ACh + VU154			VU154
	-14	76.1513	4.99761	8	89.8994	6.06701	4	94.3858	4.32535	8		-14	76.1513	4.99761	8	76.6476	4.28401	4	96.4859	3.51406	8
	-11				113.601	20.7852	3	110.073	5.75627	5		-11				81.1111	0	1	101.059	5.23393	3
	-10				103.861	13.9004	4	104.282	7.16133	8		-10				74.6863	6.58529	4	96.5478	3.87984	8
	-9				85.8141	8.73009	4	109.794	3.56491	8		-9				71.7489	15.7479	4	101.991	4.83958	8
	-8	85.0005	15.6407	4	95.6024	6.1223	4	96.2998	9.86412	8		-8	85.0005	15.6407	4	73.3872	6.01644	4	99.5785	7.48808	8
	-7	79.7793	7.73631	8	116.776	19.0315	4	124.774	13.3146	8		-7	79.7793	7.73631	8	69.6228	5.49149	4	97.34	8.91725	8
	-6	91.9449	6.72891	8	72.7637	20.611	4	119.836	17.2996	8		-6	91.9449	6.72891	8	74.8261	6.24601	4	98.5405	7.32122	8
	-5	89.6987	7.17843	8	51.2185	20.2365	4	152.252	9.23245	8		-5	89.6987	7.17843	8	67.9625	5.70817	4	102.437	10.299	8
	-4	83.512	11.3009	8								-4	83.512	11.3009	8
	-3	42.6838	8.39359	8								-3	42.6838	8.39359	8
	-2	7.76241	6.49128	8								-2	7.76241	6.49128	8
