# Supplementary material for: Pharmacological hallmarks of allostery at the M4 muscarinic receptor elucidated through structure and dynamics
Source: eLife. 2023 May 30;12:e83477. doi: 10.7554/eLife.83477 (PMC10229135; doi:10.7554/eLife.83477)
Supplement: Figure 7—figure supplement 1—source data 1. [file elife-83477-fig7-figsupp1-data1.xlsx]

## Sheet: Figure 7 – figure supplement 1A
	[3H]-NMS Interaction of Iperoxo and LY2033298 (LY298) at the mouse M4R
		0 M LY2033298			1e-7M LY298			3e-7M LY298			1e-6M LY298			3e-6M LY298			1e-5M LY298
	Log [Iperoxo] (M)	MEAN	SEM	N	MEAN	SEM	N	MEAN	SEM	N	MEAN	SEM	N	MEAN	SEM	N	MEAN	SEM	N
	Buffer (-14)	100	0	4	94.7623	3.1508	4	86.8578	3.66938	4	75.4591	5.53965	4	55.2221	1.75977	3	46.3545	2.05975	4
	-11	102.211	4.15754	4	106.602	9.65368	4	106.977	9.4321	4	86.7503	12.5879	4	52.7147	4.30617	4	50.2379	3.25461	4
	-10	101.832	6.54256	4	104.609	7.81828	4	97.6571	8.60818	4	70.8134	7.7495	4	42.8585	4.94045	4	32.9007	3.20596	4
	-9	83.9477	6.80832	4	78.9684	5.96298	4	57.2355	1.93391	4	34.8105	3.39992	4	13.6119	1.78931	4	8.96472	1.19783	4
	-8	38.4588	4.06346	4	25.7289	1.0099	4	13.8372	1.9193	4	8.12902	1.05536	4	6.2931	0.322523	4	4.19303	1.39524	4
	-7	7.05855	0.633773	4	5.17034	1.00984	4	5.67943	1.41869	4	4.75482	1.49689	4	3.59823	0.991202	4	1.3672	0.712374	4
	-6	4.44867	1.46367	4	3.19488	1.06799	4	3.90989	0.720926	4	2.05711	0.874008	4	2.03892	1.44323	4	4.12926	1.08171	4
	Non-specific (-5)	2.25434	1.03083	4	2.27213	0.479541	4	1.66304	0.795346	4	2.30488	0.841926	4	1.38293	0.36948	4
	[3H]-NMS Interaction of ACh and LY2033298 (LY298) at the mouse M4R
		0 M LY2033298			1e-7M LY298			3e-7M LY298			1e-6M LY298			3e-6M LY298			1e-5M LY298
	Log [ACh] (M)	MEAN	SEM	N	MEAN	SEM	N	MEAN	SEM	N	MEAN	SEM	N	MEAN	SEM	N	MEAN	SEM	N
	Buffer (-14)	95.0939	2.12471	4	98.2936	4.28057	4	103.504	5.55405	4	93.513	4.70785	4	84.9038	6.38439	4	81.8923	2.77596	3
	-11
	-10
	-9
	-8	95.0058	3.18828	4	97.2853	4.97734	4	96.3233	3.00041	4	91.1283	4.05913	4	83.2251	2.95666	4	70.9404	3.39721	3
	-7	97.2148	3.76785	4	98.7964	1.47975	4	95.8905	1.59702	4	90.9974	3.55172	4	75.952	5.11612	4	65.3104	5.75713	3
	-6	92.1779	3.94232	4	92.514	1.72669	4	78.6293	3.1289	4	66.5374	1.75578	4	40.325	4.51305	4	20.0828	2.87839	3
	-5	77.8839	2.57902	4	64.0659	4.36954	4	41.9304	6.73843	4	24.5449	3.34032	4	9.23963	1.39233	4	3.98298	1.1101	3
	-4	39.339	8.79621	4	16.7757	4.62541	4	7.59586	1.07485	4	3.87115	1.55512	4	1.69693	0.881894	4	-0.863947	0.693186	3
	-3	4.7811	1.17202	4	1.7416	0.472613	4	0.253356	1.32541	4	0.410031	1.67511	4	0.217318	0.973441	4	-0.845548	0.217932	3
	Non-specific (-2)	0.644546	0.359968	4	-1.05494	1.14812	4	-0.582839	1.31594	4	-1.16764	1.31234	4	-0.332291	0.804321	4	-1.2107	0.25453	3
	[3H]-NMS Interaction of Iperoxo and VU0467154 (VU154) at the mouse M4R
		0 M VU0467154			1e-7M VU154			3e-7M VU154			1e-6M VU154			3e-6M VU154			1e-5M VU154
	Log [Iperoxo] (M)	MEAN	SEM	N	MEAN	SEM	N	MEAN	SEM	N	MEAN	SEM	N	MEAN	SEM	N	MEAN	SEM	N
	Buffer (-14)	100	0	3	93.313	0.609524	3	91.3178	2.16636	3	80.2498	6.1893	3	76.4466	7.79993	3	64.5679	3.03064	3
	-11	94.2768	4.71194	3	90.8758	6.23477	3	90.2675	3.82332	3	89.5915	12.6592	3	90.4069	8.55475	3	72.134	0.177098	3
	-10	87.3887	3.97083	3	89.7981	5.35906	3	93.7627	6.01711	3	69.1657	7.75925	3	61.7188	2.55331	3	42.0186	1.69781	3
	-9	75.5166	5.37399	3	79.0464	1.44463	3	58.0658	4.04408	3	40.9083	4.18575	3	18.2332	2.19759	3	10.8361	1.15849	3
	-8	31.1167	2.6304	3	26.1273	1.01169	3	17.1716	3.12556	3	10.5635	3.42704	3	6.32309	1.39311	3	5.40945	1.14037	3
	-7	12.2561	3.36218	3	8.88462	1.9056	3	8.78644	2.53252	3	5.84683	2.07877	3	6.24634	1.27845	3	3.42105	1.09871	3
	-6	6.35071	1.81417	3	4.92081	1.78686	3	3.36643	1.26143	3	3.8368	2.94205	3	4.0963	0.79539	3	2.36629	2.00602	3
	Non-specific (-5)	3.48247	1.9761	3	2.4468	1.73104	3	3.13809	3.09556	3	2.99707	1.66262	3	2.37999	0.264169	3
	[3H]-NMS Interaction of ACh and VU0467154 (VU154) at the mouse M4R
		0 M VU0467154			3e-8M VU154			1e-7M VU154			3e-7M VU154			1e-6M VU154			3e-6M VU154
	Log [ACh] (M)	MEAN	SEM	N	MEAN	SEM	N	MEAN	SEM	N	MEAN	SEM	N	MEAN	SEM	N	MEAN	SEM	N
	Buffer (-14)	97.7376	1.8441	4	94.1013	1.07245	2	99.5659	1.86231	4	91.1039	4.16715	4	80.9035	5.87648	4	72.9972	7.85483	4
	-11
	-10
	-9
	-8	94.1281	4.33818	4	96.3687	2.85909	2	92.1929	0.517035	4	87.2967	3.62638	4	72.4944	4.86544	4	61.8194	4.69296	4
	-7	100.44	4.18348	4	104.326	4.80862	2	89.1036	3.49729	4	76.5898	3.50627	4	52.7695	3.08124	4	44.3627	3.9645	4
	-6	91.3381	3.04237	4	78.3761	10.3259	2	58.1251	4.97163	4	30.1376	2.58763	4	18.2943	1.38946	4	13.5925	1.07422	4
	-5	77.2734	2.08138	4	48.4087	13.3701	2	17.9241	1.90095	4	8.67545	1.58639	4	4.61496	0.517173	4	3.76702	0.603661	4
	-4	35.2393	2.5679	4	7.87561	0.0570797	2	3.44575	1.2287	4	3.25293	0.648538	4	1.79364	0.315492	4	2.27621	0.71647	4
	-3	3.97823	0.616414	4	2.33563	0.308602	2	1.60077	0.377614	4	0.811134	0.442492	4	2.99348	0.797523	4	2.06598	0.64743	4
	Non-specific (-2)	0.333806	0.457459	4	0.168455	0.0719298	2	0.715705	0.283848	4	0.986235	0.317517	4	1.16026	0.674317	4	1.1302	0.386442	4
	[3H]-NMS Interaction of Iperoxo and LY298 at human D432E M4R
		0 M LY2033298			1e-7M LY298			3e-7M LY298			1e-6M LY298			3e-6M LY298			1e-5M LY298
	Log [Iperoxo] (M)	MEAN	SEM	N	MEAN	SEM	N	MEAN	SEM	N	MEAN	SEM	N	MEAN	SEM	N	MEAN	SEM	N
	Buffer (-14)	100	0	5	89.3821	2.53323	5	93.6844	1.38145	5	88.9276	3.07098	5	86.7031	2.31838	5	89.4344	3.00478	5
	-11	99.5138	2.0406	5	94.8672	1.64608	5	92.6861	2.59776	5	92.6871	2.80516	5	85.9869	3.89325	5	92.5242	3.77512	5
	-10	100.297	3.09968	5	90.5967	1.44764	5	86.2775	2.65173	5	78.0081	1.25003	5	69.8232	1.19422	5	72.7954	3.55901	5
	-9	89.2518	3.92783	5	67.7128	1.57247	5	53.4247	1.26594	5	32.5345	1.58719	5	15.8613	1.06036	5	15.9948	0.478891	5
	-8	45.1455	2.89387	5	26.8942	1.47319	5	15.7856	1.86503	5	7.45949	0.917978	5	3.82009	0.503246	5	2.64872	0.307386	5
	-7	11.7689	0.799422	5	6.34356	0.490139	5	3.51751	0.580481	5	2.1924	0.412771	5	1.18961	0.208696	5	0.543334	0.190915	5
	-6	2.66677	0.322057	5	1.57291	0.0630171	5	0.811951	0.248456	5	0.66171	0.20411	5	0.236228	0.325146	5	0.691269	0.341665	5
	Non-specific (-5)	0.619937	0.132299	5	0.180004	0.151145	5	0.956083	0.137683	5	-0.0269493	0.39438	5	0.504931	0.211655	5
	[3H]-NMS Interaction of Iperoxo and VU154 at human D432E M4R
		0 M VU0467154			1e-7M VU154			3e-7M VU154			1e-6M VU154			3e-6M VU154			1e-5M VU154
	Log [Iperoxo] (M)	MEAN	SEM	N	MEAN	SEM	N	MEAN	SEM	N	MEAN	SEM	N	MEAN	SEM	N	MEAN	SEM	N
	Buffer (-14)	100	0	6	86.6364	4.4125	6	87.467	4.20459	6	86.3163	5.69866	6	85.1578	7.42407	6	76.1805	8.25302	6
	-11	101.309	1.79043	6	90.6235	4.92854	6	91.5746	4.26313	6	89.7389	4.52764	6	84.3654	8.29777	6	82.2695	8.57049	6
	-10	98.6715	2.18676	6	86.1623	3.96605	6	87.1526	4.75692	6	83.9903	5.8848	6	79.5201	6.66776	6	78.7891	6.3645	6
	-9	81.7208	4.73898	6	73.7102	3.74938	6	61.6516	1.7974	6	45.7055	1.44407	6	38.6314	1.91631	6	38.5662	2.31852	6
	-8	46.9553	3.20365	6	32.278	2.04837	6	19.6832	1.45998	6	11.4674	0.94212	6	9.77286	0.75832	6	9.57888	1.2127	6
	-7	13.3427	0.515578	6	8.32252	0.490648	6	4.2804	0.462875	6	2.41006	0.226813	6	1.99043	0.213445	6	1.56052	0.476362	6
	-6	3.12998	0.366926	6	1.83882	0.607591	6	0.896374	0.579727	6	0.409132	0.497786	6	0.231074	0.448522	6	0.615799	0.558464	6
	Non-specific (-5)	0.595489	0.243182	6	0.692715	0.213867	6	0.043926	0.304349	6	0.169537	0.179609	6	0.474853	0.35766	5	1.38889	0	1
	[3H]-NMS Interaction of Iperoxo and LY298 at human T433R M4R
		0 M LY2033298			3e-7M LY298			1e-6M LY298			3e-6M LY298			1e-5M LY298			3e-5M LY298
	Log [Iperoxo] (M)	MEAN	SEM	N	MEAN	SEM	N	MEAN	SEM	N	MEAN	SEM	N	MEAN	SEM	N	MEAN	SEM	N
	Buffer (-14)	100.011	0.010989	5	98.6505	1.9543	5	96.4878	2.68255	5	91.3479	3.24796	5	67.733	5.59356	5	31.4925	8.10321	4
	-12	101.125	0.613508	4	108.249	3.9958	4	105.665	3.85105	4	95.3009	5.0349	4	75.166	5.63551	4	35.1038	8.92814	4
	-11	105.155	4.00807	4	108.98	5.20727	4	107.54	4.35012	4	96.0663	6.61191	4	71.6101	5.61731	4	35.8699	10.8195	4
	-10	102.216	6.64682	5	103.39	4.03299	5	96.9697	3.65494	5	84.101	3.12723	5	56.194	5.9932	5	26.7958	7.05403	4
	-9	87.6613	2.64133	5	81.7827	8.62098	5	59.9126	10.5685	5	38.2121	10.8369	5	14.6546	6.74427	5	6.10721	0.892678	4
	-8	67.877	3.42816	5	41.1827	10.4115	5	22.0036	8.14397	5	6.98169	4.30238	5	-0.106743	1.90188	5	-2.50861	0.459324	4
	-7	21.9699	0.970543	5	8.34623	3.76207	5	1.40003	2.27155	5	-1.06607	1.58317	5	-2.96354	1.00228	5	-4.36656	0.5387	4
	Non-specific (-6)	0.691947	0.678295	5	-2.04251	1.20201	5	-2.69413	1.19025	5	-2.99395	1.08891	5	-3.60801	1.06741	5	-5.06699	0.482751	4
	[3H]-NMS Interaction of Iperoxo and VU154 at human T433R M4R
		0 M VU0467154			1e-7M VU154			3e-7M VU154			1e-6M VU154			3e-6M VU154			1e-5M VU154
	Log [Iperoxo] (M)	MEAN	SEM	N	MEAN	SEM	N	MEAN	SEM	N	MEAN	SEM	N	MEAN	SEM	N	MEAN	SEM	N
	Buffer (-14)	100.009	0.0091659	5	98.1389	3.30105	5	97.364	2.24117	5	99.0441	5.65394	5	97.7179	1.09022	5	93.4938	3.25346	5
	-11	99.7289	0.941144	4	97.9125	5.82095	4	97.5127	2.95055	4	102.92	4.39956	4	100.582	3.42228	4	98.6542	4.69366	4
	-10	97.3639	1.25041	5	100.356	1.81322	5	97.1232	2.36043	5	96.7918	3.76063	5	93.7311	2.08893	5	86.7945	3.65001	5
	-9	97.5663	2.26012	5	96.6235	2.1371	5	83.9623	1.52241	5	64.5027	1.76956	5	50.7634	1.79098	5	44.0742	1.53051	5
	-8	68.8625	5.55662	5	55.8828	1.93059	5	35.712	1.44347	5	18.7808	1.27867	5	11.9182	0.602233	5	9.22634	0.615075	5
	-7	23.9701	2.43338	5	14.1409	1.2331	5	7.46861	0.713914	5	4.15072	0.772384	5	1.81446	0.233989	5	1.82037	0.286243	5
	-6	5.39872	0.524112	5	1.8346	0.56098	5	1.8668	0.722993	5	0.940885	0.741681	5	0.385664	0.415342	5	0.595475	0.75951	5
	Non-specific (-5)	0.298513	0.276187	5	0.0829859	0.64974	5	0.246829	0.538331	5	-0.0886611	0.319659	5	-0.565455	0.298236	5	0.0218209	0.293014	5
	[3H]-NMS Interaction of Iperoxo and LY298 at human V91L, D432E, T433R M4R (Triple mutant)
		0 M LY2033298			1e-7M LY298			3e-7M LY298			1e-6M LY298			3e-6M LY298			1e-5M LY298
	Log [Iperoxo] (M)	MEAN	SEM	N	MEAN	SEM	N	MEAN	SEM	N	MEAN	SEM	N	MEAN	SEM	N	MEAN	SEM	N
	Buffer (-14)	100	0	4	84.4903	3.17321	4	94.2197	3.36733	4	96.4091	10.7194	4	91.434	12.3504	4	87.1518	7.39617	4
	-11	103.653	6.41301	4	91.5248	4.61701	4	88.6585	5.75079	4	95.6339	12.335	4	94.0701	16.5287	4	91.2732	7.51778	4
	-10	105.107	6.97875	4	94.9236	6.61489	4	91.8808	3.4865	4	86.5425	8.89991	4	83.9911	15.8678	4	80.992	13.3311	4
	-9	89.9195	4.9045	4	80.1123	1.76055	4	70.0016	4.66346	4	59.0244	6.56155	4	37.0711	8.87424	4	26.9821	5.31312	4
	-8	59.472	3.13286	4	45.7755	5.38354	4	33.6795	5.12711	4	22.3758	7.02456	4	10.3874	3.99431	4	6.55566	2.86826	4
	-7	21.1312	1.94065	4	15.6583	4.51557	4	10.7445	3.99005	4	3.90326	1.33654	4	2.51683	0.953381	4	1.37414	1.19153	4
	-6	3.70891	0.915953	4	1.86186	0.791798	4	1.57788	0.633418	4	1.2223	0.894007	4	0.359985	0.421379	4	2.51339	2.57359	4
	Non-specific (-5)	0.508119	0.460214	4	1.23963	1.14931	4	0.506448	0.658155	4	0.561669	0.610417	4	0.193083	0.793932	4
	[3H]-NMS Interaction of Iperoxo and VU154 at human V91L, D432E, T433R M4R (Triple mutant)
		0 M VU0467154			1e-7M VU154			3e-7M VU154			1e-6M VU154			3e-6M VU154			1e-5M VU154
	Log [Iperoxo] (M)	MEAN	SEM	N	MEAN	SEM	N	MEAN	SEM	N	MEAN	SEM	N	MEAN	SEM	N	MEAN	SEM	N
	Buffer (-14)	100	0	4	80.4728	6.47376	4	79.752	8.47374	4	77.5012	14.6609	4	77.812	15.8842	4	69.265	11.6424	4
	-11	97.1043	3.29394	4	81.2633	5.70256	4	81.3996	8.00524	4	79.1109	13.3975	4	75.5547	16.1243	4	66.2181	11.0191	4
	-10	99.2021	4.13592	4	83.7431	5.65433	4	77.4499	8.85725	4	69.0013	10.5338	4	73.585	15.0478	4	62.2967	8.7431	4
	-9	91.4369	4.90773	4	71.3155	4.29433	4	56.0296	4.90815	4	40.8305	4.57743	4	32.8494	4.73503	4	29.724	2.12505	4
	-8	61.2766	4.32399	4	36.6905	4.12849	4	18.9674	2.96448	4	11.6235	2.19516	4	8.44464	1.74335	4	7.03283	1.07922	4
	-7	19.3792	1.24384	4	10.1042	2.37861	4	4.80346	1.45553	4	2.59273	0.789173	4	1.74507	0.368863	4	1.11922	0.479826	4
	-6	4.25536	0.242691	4	2.18735	0.911582	4	1.04972	0.579058	4	0.525421	0.743426	4	0.148287	0.137291	4	0.62166	0.371918	4
	Non-specific (-5)	0.681672	0.352034	4	-0.171313	0.341623	4	0.311516	0.279919	4	0.299769	0.487184	4	-0.19116	0.399742	4	-0.123001	0	1

## Sheet: Figure 7– figure supplement B-D
	Figure 7 – figure supplement 1B – Binding Affinity (pKB)
		LY2033298			VU0467154
		MEAN	SEM	N	MEAN	SEM	N
	human M4	5.65	0.07	8	5.83	0.11	12
	D432E hM4	5.86	0.07	5	6.21	0.12	6
	T433R hM4	5.04	0.04	5	5.5	0.08	5
	Triple hM4	5.29	0.26	4	6.34	0.16	4
	mouse M4	5.74	0.07	8	6.07	0.09	8
	Figure 7 – figure supplement 1C – Binding Modulation (log [alpha])
		LY2033298			VU0467154
		MEAN	SEM	N	MEAN	SEM	N
	human M4	1.86	0.1	4	1.03	0.1	8
	D432E hM4	1.59	0.06	5	1.04	0.09	6
	T433R hM4	1.91	0.11	5	1.67	0.07	5
	Triple hM4	1.8	0.22	4	1.35	0.16	4
	mouse M4	1.3	0.11	4	1.75	0.12	3
	Figure 7 – figure supplement 1D – PAM binding affinity for Ipx bound state
		LY2033298			VU0467154
		MEAN	SEM	N	MEAN	SEM	N
	human M4	7.51	0.12	4	6.86	0.15	8
	D432E hM4	7.45	0.09	5	7.25	0.15	6
	T433R hM4	6.95	0.12	5	7.17	0.11	5
	Triple hM4	7.09	0.34	4	7.69	0.23	4
	mouse M4	7.04	0.13	4	7.82	0.15	3
