# Supplementary material for: Pharmacological hallmarks of allostery at the M4 muscarinic receptor elucidated through structure and dynamics
Source: eLife. 2023 May 30;12:e83477. doi: 10.7554/eLife.83477 (PMC10229135; doi:10.7554/eLife.83477)
Supplement: Figure 7—figure supplement 2—source data 1. [file elife-83477-fig7-figsupp2-data1.xlsx]

## Sheet: Figure 7 – figure supplement 2A
	pERK1/2 – Interaction of Iperoxo and LY2033298 (LY298) at the mouse M4R
		0 M LY2033298			1e-7M LY298			3e-7M LY298			1e-6M LY298			3e-6M LY298			1e-5M LY298
	Log [Iperoxo] M	MEAN	SEM	N	MEAN	SEM	N	MEAN	SEM	N	MEAN	SEM	N	MEAN	SEM	N	MEAN	SEM	N
	-6	100	0	4	112.217	7.06527	4	106.275	10.2935	4	105.483	15.5887	4	126.166	7.67029	4	138.437	5.57449	4
	-7	84.635	1.65887	4	100.678	4.72225	4	107.022	2.87716	4	116.246	9.1829	4	117.709	7.80091	4	121.094	4.28939	4
	-8	57.6081	2.68281	4	91.0271	2.75006	4	91.72	3.01863	4	101.652	5.87155	4	109.472	3.8691	4	108.61	1.62871	4
	-9	19.2369	3.18624	4	58.1671	4.70267	4	62.4427	1.18773	4	76.4163	9.41907	4	90.8649	7.003	4	83.6491	2.40832	4
	-10	1.53513	0.620691	4	8.81943	1.49799	4	15.8044	1.17914	4	35.182	2.25826	4	63.5978	4.3825	4	55.3378	1.69445	4
	-11	-0.189141	0.309014	4	0.765024	0.29306	4	2.30404	0.647832	4	20.823	2.39495	4	45.8084	5.84317	4	44.0749	2.49222	4
	-14	0	0	4	-0.353469	0.792922	4	3.63962	2.01747	4	17.3989	1.10542	4	52.3761	7.13595	4	44.963	6.69392	4
	pERK1/2 – Interaction of Iperoxo and VU0467154 (VU154) at the mouse M4R
		0 M VU0467154			1e-8M VU154			3e-8M VU154			1e-7M VU154			3e-7M VU154			1e-6M VU154			3e-6M VU154
	Log [Iperoxo] M	MEAN	SEM	N	MEAN	SEM	N	MEAN	SEM	N	MEAN	SEM	N	MEAN	SEM	N	MEAN	SEM	N	MEAN	SEM	N
	-6	100	0	5	124.668	9.30306	4	128.582	13.0337	4	124.281	11.8431	5	124.089	9.77052	5	139.459	17.2776	5	129.145	4.42456	2
	-7	83.8074	2.16927	5	111.214	7.33408	4	115.461	11.5696	4	112.311	11.5125	5	116.044	12.1794	5	124.044	16.1082	5	116.8	3.01048	2
	-8	58.9342	2.88208	5	91.2525	6.48045	4	98.6418	7.48778	4	100.347	7.53278	5	100.344	9.28638	5	110.525	13.5171	5	120.575	0.237492	2
	-9	23.0656	3.38153	5	54.7775	8.40732	4	55.581	6.5028	4	80.9334	6.0812	5	90.8773	8.59513	5	103.338	12.1459	5	95.3568	4.66462	2
	-10	1.81984	1.15907	5	9.02394	3.3093	4	15.0493	4.13324	4	33.0392	4.58588	5	51.2704	3.50587	5	70.3946	5.40614	5	75.2356	2.77541	2
	-11	-0.210219	0.734631	5	1.01956	1.61393	4	2.95759	1.85296	4	14.1671	2.7528	5	27.4871	3.05449	5	50.7013	2.9815	5	53.8014	0.0501728	2
	-14	0	0	5	0.306192	1.39314	4	1.87585	1.61173	4	10.0113	2.6333	5	19.8341	4.01621	5	48.5882	5.52771	5	56.2677	0.695518	2
	pERK1/2 – Interaction of Iperoxo and LY298 at human D432E M4R
		0 M LY2033298			1e-8M LY298			3e-8M LY298			1e-7M LY298			3e-7M LY298			1e-6M LY298
	Log [Iperoxo] M	MEAN	SEM	N	MEAN	SEM	N	MEAN	SEM	N	MEAN	SEM	N	MEAN	SEM	N	MEAN	SEM	N
	-7	97.3233	2.67671	5	109.52	6.88983	4	108.418	6.17743	4	100.089	5.90586	5	109.113	9.55095	5	113.035	10.9303	5
	-8	90.3662	5.35916	5	103.876	12.9268	4	100.687	8.25767	4	93.2309	8.9399	5	93.2133	10.633	5	98.8353	12.1677	5
	-9	75.8847	4.61661	5	89.3919	7.85504	4	91.3135	10.9649	4	84.4654	8.36286	5	88.1733	11.7736	5	93.4632	10.0055	5
	-10	30.1045	4.83845	5	52.5074	7.11528	4	53.8297	7.39988	4	63.0197	6.1605	5	74.1087	10.7654	5	84.9667	12.5174	5
	-11	-0.361481	4.68518	5	-1.75167	7.14826	4	9.95545	7.56007	4	31.4651	11.1438	5	57.9726	5.97323	5	77.9564	10.2893	5
	-12	17.1885	8.78327	4	12.4177	7.51918	4	4.12678	2.72813	4	9.25798	9.42746	4	53.1348	13.5604	4	76.8154	10.6909	4
	-14	0	0	5	-26.1502	27.0249	4	-8.27964	16.9837	4	8.28093	6.58672	5	46.8728	9.78577	5	74.5694	12.8714	5
	pERK1/2 – Interaction of Iperoxo and VU154 at human D432E M4R
		0 M VU0467154			1e-8M VU154			3e-8M VU154			1e-7M VU154			3e-7M VU154			1e-6M VU154			3e-6M VU154
	Log [Iperoxo] M	MEAN	SEM	N	MEAN	SEM	N	MEAN	SEM	N	MEAN	SEM	N	MEAN	SEM	N	MEAN	SEM	N	MEAN	SEM	N
	-7	98.8793	1.12065	5	109.142	1.93087	4	115.632	4.49714	4	109.202	5.92885	5	112.041	8.18735	5	116.695	11.5426	5
	-8	98.8781	5.40342	5	108.727	2.45381	4	113.285	4.7564	4	105.237	7.72827	5	107.389	8.35672	5	105.961	10.2258	5	103.473	2.01607	2
	-9	85.9252	5.96711	5	99.5066	5.6212	4	105.226	5.77688	4	97.3643	7.07974	5	100.761	8.84515	5	102.5	10.3465	5	104.167	1.80061	2
	-10	56.2204	1.06335	5	80.9494	2.88794	4	83.2896	3.31908	4	83.9858	4.93634	5	91.0525	7.45451	5	91.4142	7.07461	5	101.094	1.62974	2
	-11	2.37798	0.697676	5	3.74295	0.973596	4	33.0967	14.2994	4	33.5764	5.77233	5	54.2292	10.2036	5	60.3356	4.02756	5	73.1589	2.81798	2
	-12	-1.8222	0.368517	4	-11.5969	5.84499	4	-5.54941	2.66284	4	6.13486	1.13987	4	30.1927	7.49475	4	54.6236	7.34551	4
	-14	0	0	5	-12.6151	8.04301	4	8.58111	3.81235	4	4.54144	4.98885	5	26.2217	5.09727	5	60.8932	4.3172	5	69.2321	2.19841	2
	pERK1/2 – Interaction of Iperoxo and LY298 at human T433R M4R
		0 M LY2033298			1e-7M LY298			3e-7M LY298			1e-6M LY298			3e-6M LY298			1e-5M LY298
	Log IPX(M)	MEAN	SEM	N	MEAN	SEM	N	MEAN	SEM	N	MEAN	SEM	N	MEAN	SEM	N	MEAN	SEM	N
	FBS	98.0998	1.90016	5	95.6657	1.96114	5	95.336	3.47468	5	92.9076	3.07113	5	87.05	7.40346	5	93.9475	5.13247	5
	-7	82.997	4.40023	5	85.8405	6.6794	5	83.5234	5.45705	5	88.1389	6.25159	5	88.3058	4.02557	5	87.5062	3.82405	5
	-8	80.943	7.61297	5	83.9693	5.06012	5	85.3943	5.2415	5	79.0473	8.45594	5	80.8139	7.55171	5	84.3231	5.89753	5
	-9	69.4045	8.54197	5	85.2609	6.39344	5	87.8608	7.51407	5	73.3311	9.6889	5	73.3268	11.2213	5	84.4782	5.41598	5
	-10	32.3217	7.20504	5	47.4571	5.44646	5	58.5825	8.49874	5	71.7732	8.93881	5	83.4614	6.21074	5	77.7845	8.05644	5
	-11	1.53867	0.823795	5	8.45422	2.75926	5	28.2552	7.19887	5	55.19	14.2459	5	73.6793	11.0468	5	78.7998	7.57161	5
	-12	2.02389	1.28009	5	1.41141	0.852604	5	15.9444	5.55759	5	55.9499	6.75374	5	63.6315	11.7803	5	75.1031	6.43652	5
	Buffer (-13)	1.2008	0.559594	5	2.47582	1.13485	5	16.9822	2.79926	5	47.1705	14.3849	5	75.016	5.92822	5	78.0705	6.17528	5
	pERK1/2 – Interaction of Iperoxo and VU154 at human T433R M4R
		0 M VU0467154			1e-7M VU154			3e-7M VU154			1e-6M VU154			3e-6M VU154			1e-5M VU154
	Log IPX(M)	MEAN	SEM	N	MEAN	SEM	N	MEAN	SEM	N	MEAN	SEM	N	MEAN	SEM	N	MEAN	SEM	N
	FBS	97.5309	2.46905	5	92.6883	3.51089	5	95.1344	2.28071	5	90.8443	4.99448	5	93.1413	4.90051	5	97.9063	1.99228	5
	-7	84.0675	3.90194	5	94.1081	3.63809	5	93.8919	3.88959	5	94.4188	2.08496	5	88.0066	6.22225	5	87.296	5.72789	5
	-8	81.7946	6.45765	5	88.1139	3.61348	5	87.5576	3.29279	5	91.8372	4.2792	5	89.5533	2.7792	5	83.8201	2.4681	5
	-9	75.8613	5.97482	5	79.1837	5.8914	5	79.2427	4.44153	5	87.3995	3.52262	5	89.1631	3.99439	5	78.4996	5.54734	5
	-10	37.4173	4.98205	5	47.1764	3.41809	5	59.4965	5.45689	5	75.7064	4.9812	5	81.774	5.11968	5	69.0736	2.51644	5
	-11	2.32161	0.887613	5	5.92978	1.83454	5	15.7057	4.25693	5	37.8492	6.19228	5	56.1353	5.9834	4	61.1196	4.08598	5
	-12	0	0	5	1.05189	0.753948	5	4.80147	3.9548	5	29.7717	6.93499	5	51.4765	8.34526	5	58.857	6.69453	5
	Buffer (-13)	1.49275	0.929807	5	0.571725	0.350438	5	4.43806	1.44821	5	23.9987	4.91197	5	48.1267	8.38489	5	58.5387	6.58501	5
	pERK1/2 – Interaction of Iperoxo and LY298 at the V91L,D432E,T433R M4R (Triple mutant)
		0 M LY2033298			1e-8M LY298			3e-8M LY298			1e-7M LY298			3e-7M LY298			1e-6M LY298
	Log [Iperoxo] M	MEAN	SEM	N	MEAN	SEM	N	MEAN	SEM	N	MEAN	SEM	N	MEAN	SEM	N	MEAN	SEM	N
	-7	98.1295	1.87053	5	109.295	8.98667	4	103.59	8.76002	4	99.8294	5.69206	5	104.614	8.92343	5	112.228	11.8968	5
	-8	86.7811	3.2378	5	97.7782	4.52056	4	93.887	7.52233	4	87.2776	5.29224	5	98.0949	12.4117	5	101.222	12.7316	5
	-9	65.9729	2.94961	5	85.3169	6.23948	4	80.8273	7.88105	4	77.5148	8.6701	5	88.441	9.3328	5	91.2017	12.7401	5
	-10	23.06	3.10818	5	42.5486	11.0875	4	48.9041	13.2442	4	55.0025	10.4786	5	69.2639	10.4294	5	76.4743	8.91849	5
	-11	-0.134132	0.923887	5	12.1688	9.08741	4	15.6501	8.91437	4	18.7534	8.01934	5	51.396	10.7569	5	71.706	11.8624	5
	-12	-1.84059	1.3662	4	12.6702	9.50434	4	17.4071	11.4449	4	11.7249	7.60544	4	44.952	10.3952	4	68.5621	10.426	4
	-14	0	0	5	5.72896	4.37971	4	13.1676	8.07778	4	18.7149	12.1	5	43.7713	10.8966	5	68.8618	10.0808	5
	pERK1/2 – Interaction of Iperoxo and VU154 at the V91L,D432E,T433R M4R (Triple mutant)
		0 M VU0467154			1e-8M VU154			3e-8M VU154			1e-7M VU154			3e-7M VU154			1e-6M VU154			3e-6M VU154
	Log [Iperoxo] M	MEAN	SEM	N	MEAN	SEM	N	MEAN	SEM	N	MEAN	SEM	N	MEAN	SEM	N	MEAN	SEM	N	MEAN	SEM	N
	-7	98.9093	1.09071	5	97.7002	5.896	4	104.184	2.49889	4	100.178	4.95637	4	108.012	5.5601	4	107.679	10.2467	5
	-8	94.9554	3.94739	5	94.3887	3.56896	4	95.1782	2.69129	4	93.5824	3.75108	4	104.842	3.59853	4	103.647	8.9651	5	96.0928	0.134603	2
	-9	74.7412	1.73689	5	91.0639	3.67121	4	83.4442	3.50194	4	93.5213	3.68404	4	101.762	5.22065	4	96.5369	6.71354	5	102.52	2.37828	2
	-10	25.7383	1.99544	5	48.3301	3.13988	4	55.7257	3.85992	4	66.1056	2.89895	4	80.0713	1.8237	4	85.3552	3.44962	5	95.8902	0.550152	2
	-11	0.757832	0.549004	5	3.88389	1.29706	4	12.7089	2.46144	4	21.7258	1.00447	4	49.8867	4.10003	4	65.6201	3.6274	5	73.6182	2.45566	2
	-12	-0.660364	0.134431	4	-0.722197	0.181942	4	2.65918	1.05928	4	14.9184	1.45492	4	38.7336	3.45779	4	66.7538	6.33916	4
	-14	0	0	5	-1.00895	0.45501	4	-0.868877	0.431683	4	9.03004	1.29662	4	40.6542	3.19955	4	63.0418	2.89002	5	75.1509	2.88101	2

## Sheet: Figure7–figure supplement 2B-E
	Figure 7 – figure supplement 2B – Efficacy of pERK1/2 activation (log [corrected tau])
		VU154			LY203298
		MEAN	SEM	N	MEAN	SEM	N
	human M4	0.11	0.05341	12	1.19	0.05	12
	D432E hM4	0.78	0.08	5	1.34	0.08	5
	T433R hM4	0.95	0.11532	5	1.73	0.1338	5
	Triple hM4	0.68	0.06	5	1.62	0.08851	5
	mouse M4	1.47	0.08	5	1.32	0.07	5
	Figure 7 – figure supplement 2C – Transduction coupling of pERK1/2 (log ([corrected tau]/[pKB]))
		VU154			LY298
		MEAN	SEM	N	MEAN	SEM	N
	human M4	5.94	0.12	12	6.84	0.08	12
	D432E hM4	6.99	0.14	5	7.2	0.11	5
	T433R hM4	6.45	0.14	5	6.77	0.14	5
	Triple hM4	7.02	0.17	5	6.91	0.28	5
	mouse M4	7.54	0.12	5	7.06	0.0989949	5
	Figure 7 – figure supplement 2D – Functional Modulation of pERK1/2 activation (log [alpha•beta])
		VU154			LY298
		MEAN	SEM	N	MEAN	SEM	N
	human M4	0.66	0.15	8	1.08	0.28	8
	D432E hM4	1.02	0.15	5	1.37	0.28	5
	T433R hM4	1.18	0.1418	5	1.854	0.2754	5
	Triple hM4	1.34	0.11	5	1.64	0.3	5
	mouse M4	2.08	0.15	5	1.24	0.12	4
	Figure 7 – figure supplement 2E – Efficacy modulation of pERK1/2 activation (log [beta] = log [alpha•beta] – log [alpha])
		VU154			LY298
		MEAN	SEM	N	MEAN	SEM	N
	human M4	-0.37	0.180278	8	-0.78	0.297321	4
	D432E hM4	-0.02	0.174929	6	-0.22	0.286356	5
	T433R hM4	-0.49	0.158137	5	-0.056	0.296555	5
	Triple hM4	-0.01	0.194165	4	-0.16	0.372022	4
	mouse M4	0.33	0.192094	3	-0.06	0.162788	4
