# Supplementary material for: Pharmacological hallmarks of allostery at the M4 muscarinic receptor elucidated through structure and dynamics
Source: eLife. 2023 May 30;12:e83477. doi: 10.7554/eLife.83477 (PMC10229135; doi:10.7554/eLife.83477)
Supplement: Figure 7—source data 1. [file elife-83477-fig7-data1.xlsx]

## Sheet: Figure 7B-C
	Figure 7B – Binding Affinity (pKB)
		VU0467154
		MEAN	SEM	N
	human M4	5.83	0.11	12
	D432E hM4	6.21	0.12	6
	T433R hM4	5.5	0.08	5
	Triple hM4	6.34	0.16	4
	mouse M4	6.07	0.09	8
	Figure 7C – Efficacy of pERK1/2 activation (log [corrected tau])
		VU0467154
		MEAN	SEM	N
	human M4	0.11	0.05341	12
	D432E hM4	0.78	0.08	5
	T433R hM4	0.95	0.11532	5
	Triple hM4	0.68	0.06	5
	mouse M4	1.47	0.08	5
